# Supplementary material
Source: PubMed Central journal article supplement (PMC3093921)
Supplement: NIHMS284863-supplement-supplement_1.pdf [file NIHMS284863-supplement-supplement_1.pdf]

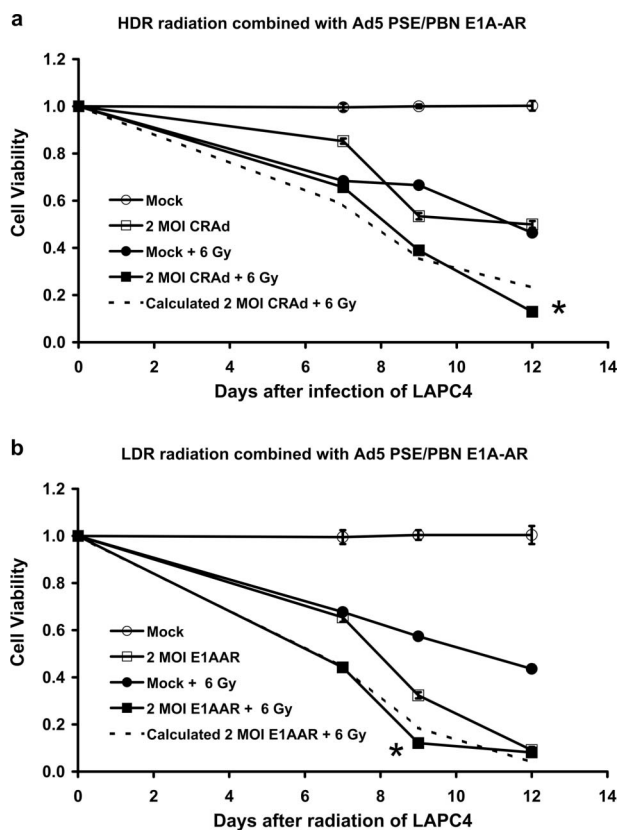

Supplementary Figure S1. In vitro cytotoxicity of CRAd in combination with two types of radiation for the treatment of LAPC4 cells. LAPC4 cells were infected with 2 MOI of Ad5 PSE/PBN E1A-AR on 48-well plates for both combinations. In (a), acute single HDR radiation (6 Gy) was performed 24 hours prior to infection. In (b), continuous LDR radiation (6 Gy) was performed immediately after infection. Error bars indicate the SEM for three independent experiments.

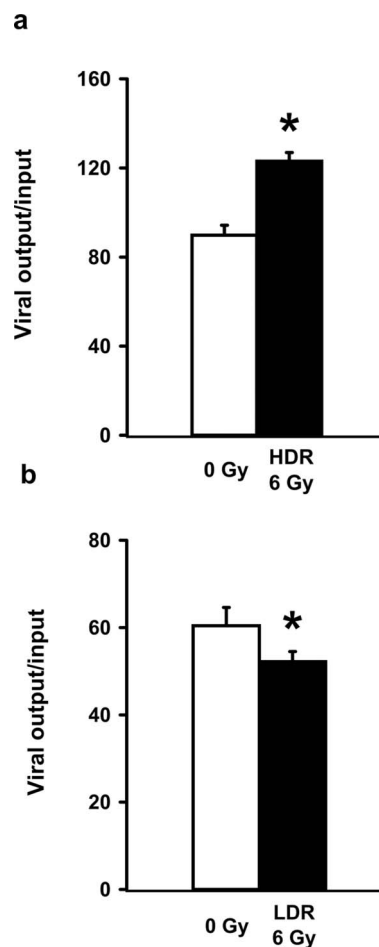

Supplementary Figure S2. Reciprocal effect of radiation on viral replication in LAPC4 cells. LAPC4 cells were infected with 2 MOI of Ad5 PSE/PBN E1A-AR on 100 mm dishes; the amount of viral amplification seven days after treatment was titrated using antibody against viral hexon. In (a): acute single HDR radiation (6 Gy) was performed 24 hours prior to infection. In (b): continuous LDR radiation (6 Gy) was performed immediately after infection. Error bars indicate the SEM for three independent experiments.

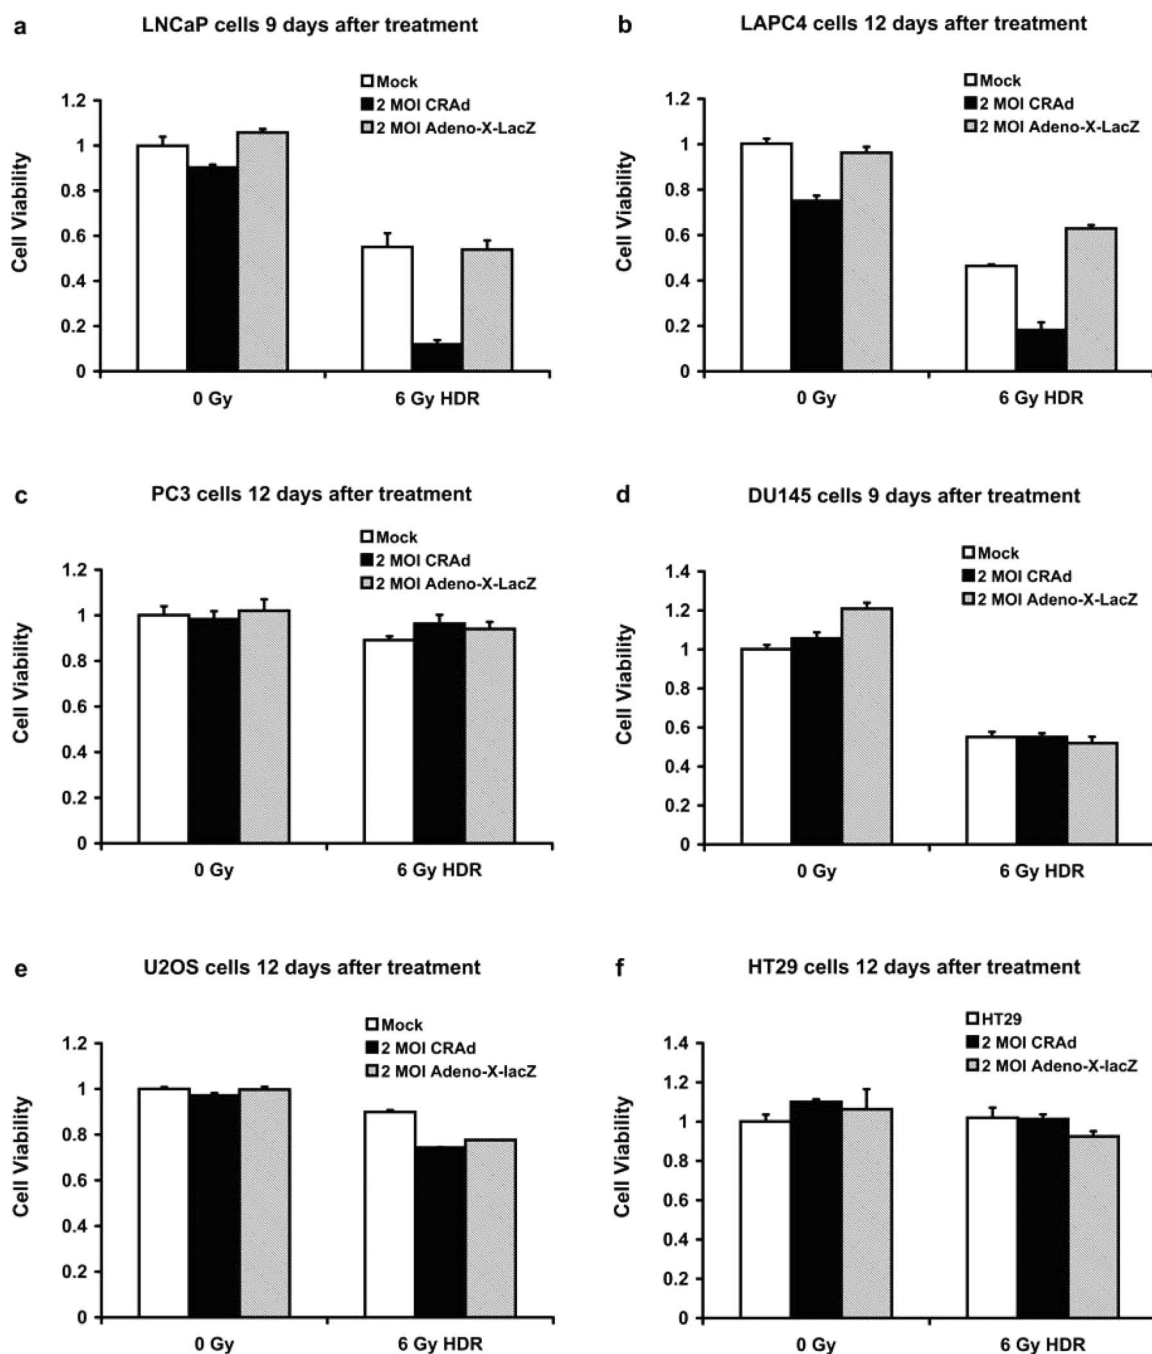

Supplementary Figure S3. In vitro cytotoxicity of CRAAd in comparison with a control virus in AR positive, AR negative, and non-prostate cancer cells. All cells were pre-treated with acute single HDR radiation 24 hours prior to infection. Cells were infected with 2 MOI of Ad5 PSE/PBN E1A-AR and Adeno-X-LacZ on 48-well plates. MTT assay was used to assess cell viability. Error bars indicate the SEM for three independent experiments.
